# Supplementary material
Source: PubMed Central journal article supplement (PMC7611072)

# Unprocessed blots for Figure 1g

## Liver AL

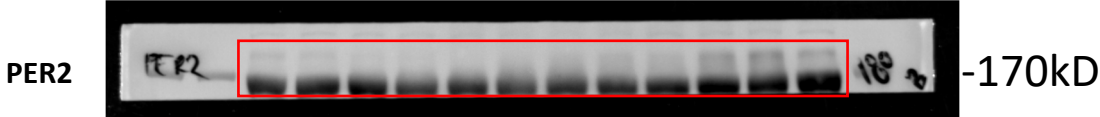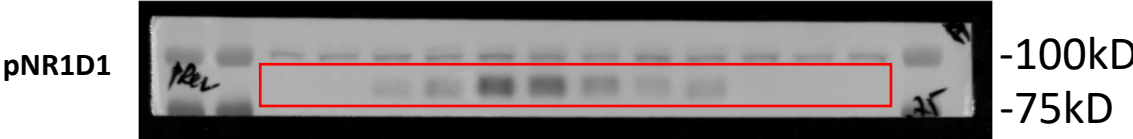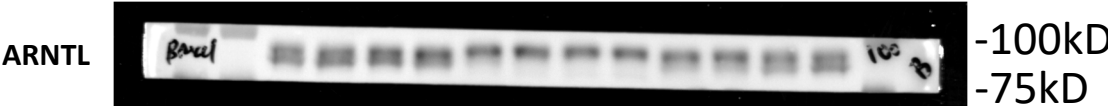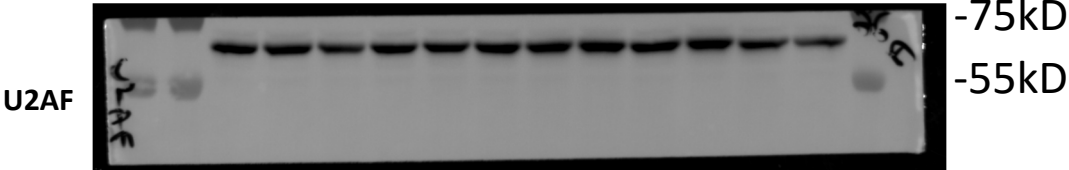

# Liver DF

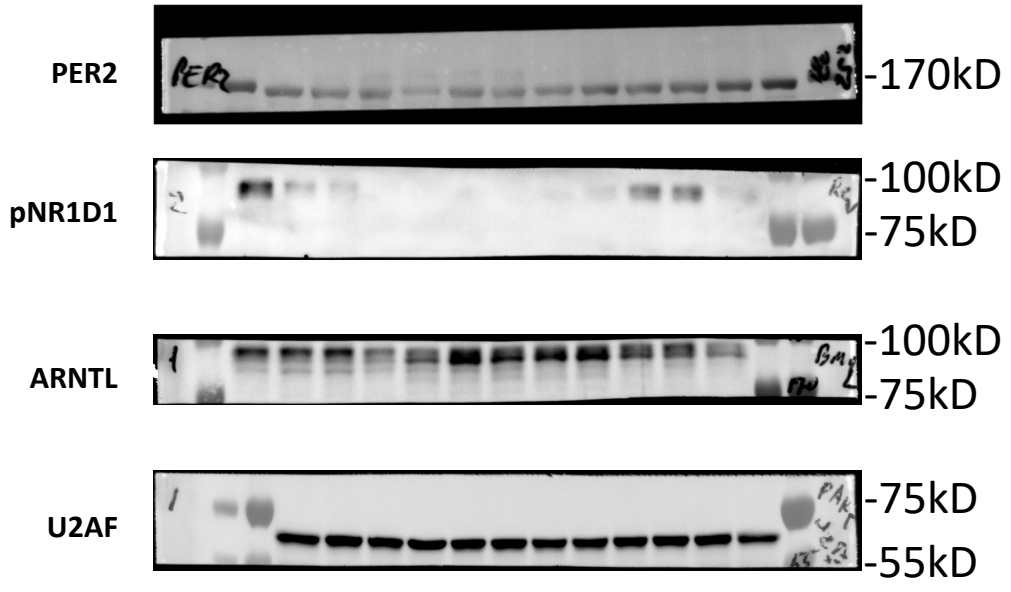

# Lung AL

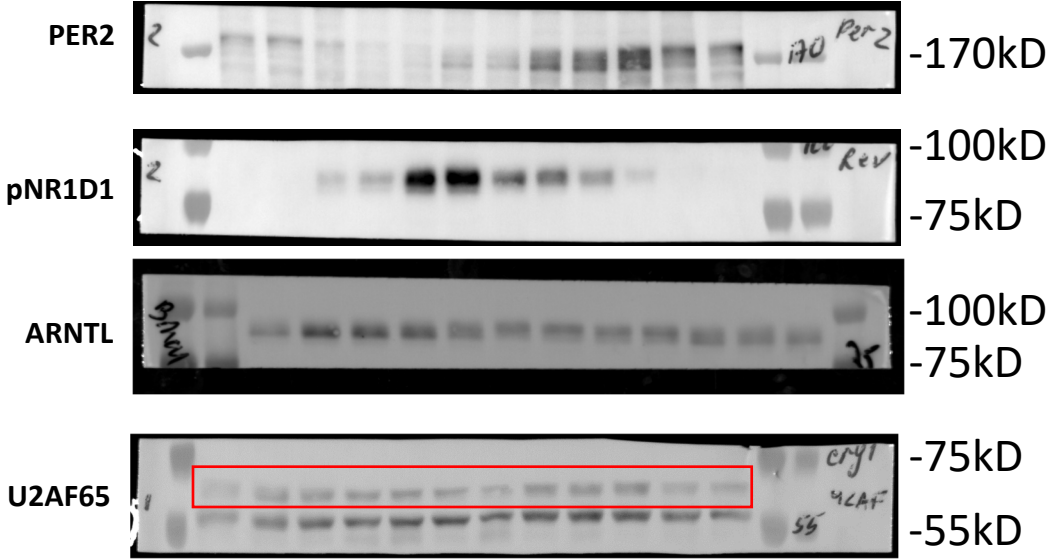

# Lung DF

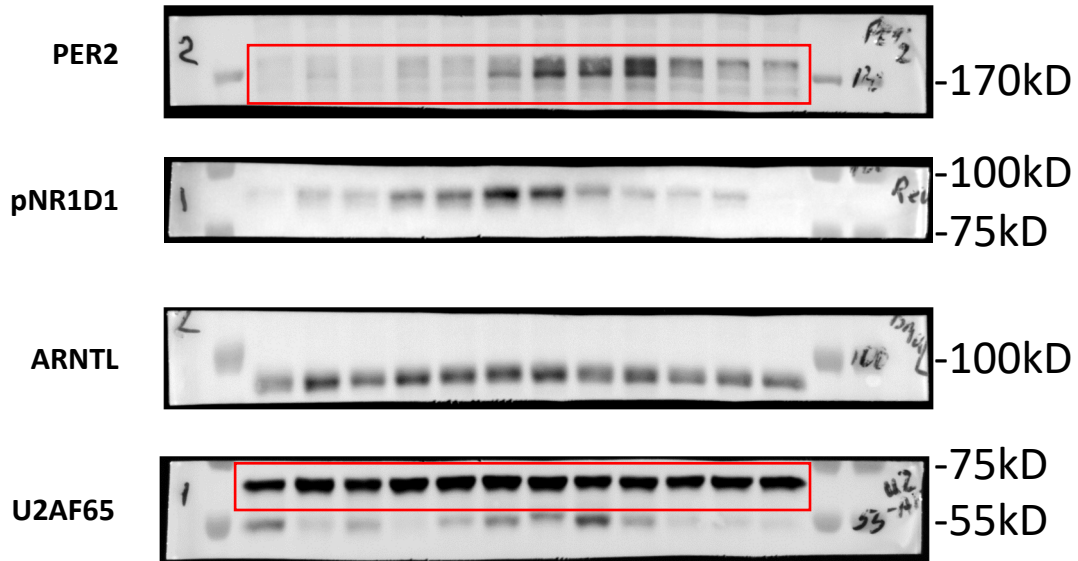

Supplement: EMS123220-supplement-Source_Data_Fig1.pdf [file EMS123220-supplement-Source_Data_Fig1.pdf]
